# Supplementary material for: Dispersion and Dosimetric Challenges of Hydrophobic Carbon-Based Nanoparticles in In Vitro Cellular Studies
Source: MDPI journal article supplement (doi:10.3390/nano14070589), 2024-03-27
Supplement: s1 [file s1]

*Supplementary information for*

**Dispersion and Dosimetric Challenges of Hydrophobic  
Carbon-Based Nanoparticles in In Vitro Cellular Studies**

*Denisa Lizonova<sup>1</sup>, Una Trivanovic<sup>2</sup>, Philip Demokritou<sup>1,\*</sup>, Georgios. A. Kelesidis<sup>1,2,\*</sup>*

<sup>1</sup> Nanoscience and Advanced Materials Center (NAMC), Environmental and Occupational Health Science  
Institute, School of Public Health, Rutgers University, 170 Frelinghuysen Road, Piscataway,  
NJ, 08854, USA

<sup>2</sup> Particle Technology Laboratory, Institute of Energy and Process Engineering, Department  
of Mechanical and Process Engineering, ETH Zürich, Sonneggstrasse 3, CH-8092, Zürich, Switzerland

\*Corresponding authors: [philip.demokritou@rutgers.edu](mailto:philip.demokritou@rutgers.edu), [georgios.kelesidis@rutgers.edu](mailto:georgios.kelesidis@rutgers.edu)

8 Pages

3 Tables

5 Figures

19    **Summary**

20    Figure S1.....p. S3

21        S2.....p. S5

22        S3.....p. S6

23        S4.....p. S7

24        S5.....p. S8

25    Table S1.....p. S4

26        S2.....p. S6

27        S3.....p. S7

28

OCA35, DataPhysics

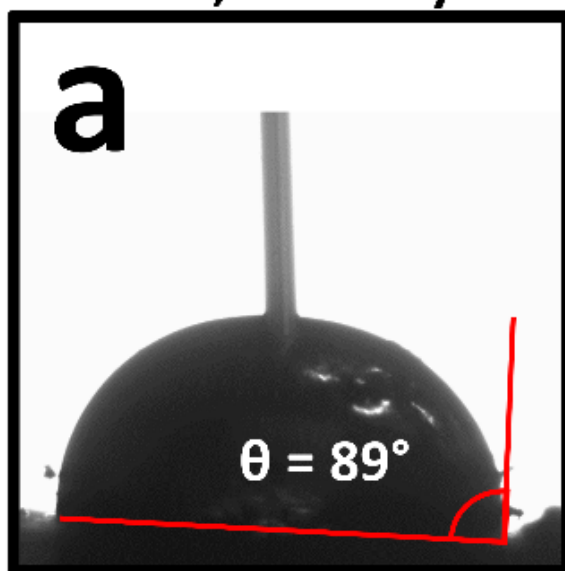

Custom

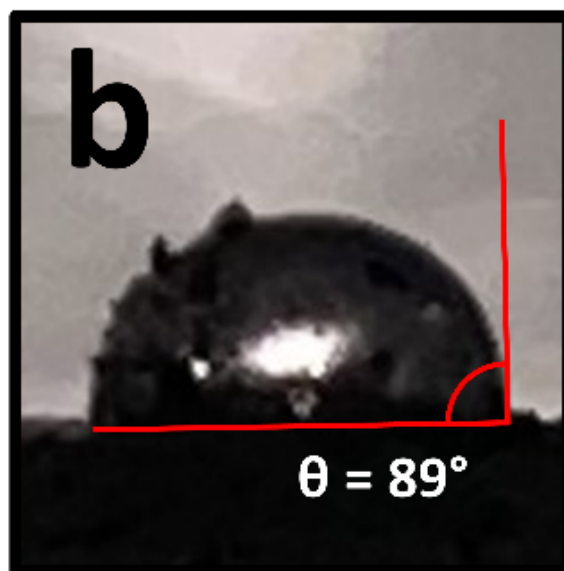

29

30 **Figure S1.** Water Contact Angle (WCA) measured with a) a high precision optical measuring  
31 device (OCA35, DataPhysics) and b) the custom goniometer used in this work.

**Table S1.** Summary of the parameters used for the particle dosimetry calculation by the DG model. The viscosities of the media were measured by a Cannon Fenske viscometer for water-based solutions, submerged in a heating bath equilibrated to 37 °C. The densities were measured by weighing a known volume of the medium pre-warmed to 37 °C in a heating bath.

|                       |                                         | RPMI                            | SABM                    |
|-----------------------|-----------------------------------------|---------------------------------|-------------------------|
| Particle Parameters   | Material                                | User defined                    |                         |
|                       | Density                                 | 1.8 g/cm <sup>3</sup>           |                         |
|                       | Distribution type                       | Fraction distribution by volume |                         |
|                       | Effective density                       | 1.03 g/cm <sup>3</sup>          | 1.07 g/cm <sup>3</sup>  |
| Solvent Parameters    | Density                                 | 1.0104 g/cm <sup>3</sup>        | 0.995 g/cm <sup>3</sup> |
|                       | Viscosity                               | 0.0081 P                        | 0.0075 P                |
|                       | Temperature                             | 37 °C                           | 37 °C                   |
| Simulation Parameters | Suspension column height                | 4.5 mm                          |                         |
|                       | Height of subcompartment                | 0.005 mm                        |                         |
|                       | Initial total concentration of material | 0.1 mg/cm <sup>3</sup>          |                         |
|                       | Centrifugation                          | 1 (gravity)                     |                         |
|                       | Total time of simulation                | 24 h                            |                         |
|                       | Time interval for simulation            | 0.5 s                           |                         |
| Output Parameters     | Time interval                           | 30 min                          |                         |
|                       | Compartment height                      | 0.01 mm                         |                         |
|                       | Write output for...                     | Bottom area only                |                         |

|             | 0 h                                                                               | 6 h                                                                               | 12 h                                                                              | 24 h                                                                               | 48 h                                                                                | 72 h                                                                                |
|-------------|-----------------------------------------------------------------------------------|-----------------------------------------------------------------------------------|-----------------------------------------------------------------------------------|------------------------------------------------------------------------------------|-------------------------------------------------------------------------------------|-------------------------------------------------------------------------------------|
| <b>RPMI</b> |  |  |  |  |  |  |
| Z-Average   | 98 nm                                                                             | 347 nm                                                                            | 345 nm                                                                            | 329 nm                                                                             | 347 nm                                                                              | 331 nm                                                                              |
| <b>SABM</b> |  |  |  |  |  |  |
| Z-Average   | 218 nm                                                                            | 280 nm                                                                            | 319 nm                                                                            | 336 nm                                                                             | 309 nm                                                                              | 365 nm                                                                              |

**Figure S2.** Representative images of BC NPs dispersed in RPMI (top) and SABM (bottom) after stirring for 0-72 h along with the respective Zeta-Average (Z-Average) measured by Dynamic Light Scattering (DLS).

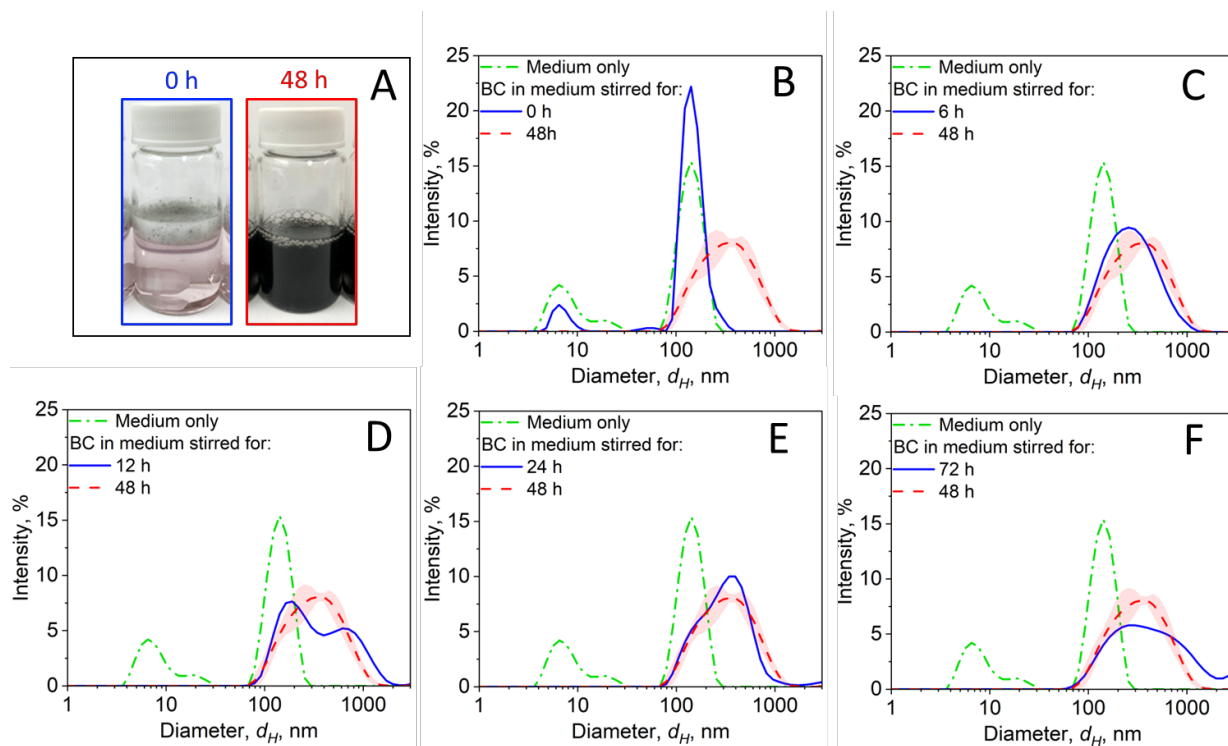

**Figure S3.** Representative images (A) of the dispersions of BC NPs in SABM medium after stirring for 0 (blue-framed) and 48 h (red-framed), along with intensity-based particle size distributions measured by DLS for the medium only (dot-broken line) or BC dispersions after 0 (B), 6 (C), 12 (D), 24 (E), 72 (F) or 48 h (broken line). Variation within three DLS measurements of the sample stirred for 48 h is quantified by the red shaded area.

**Table S2.** Zeta potential and conductivity of BC NPs dispersed in RPMI and SABM media measured by DLS for stable dispersions obtained at 24 h and 48 h of stirring, respectively.

|            | Zeta Potential (mV) | Conductivity (mS/cm) |
|------------|---------------------|----------------------|
| BC in RPMI | $-13 \pm 2$         | $15.7 \pm 1.3$       |
| BC in SABM | $-12 \pm 1$         | $14.2 \pm 0.8$       |

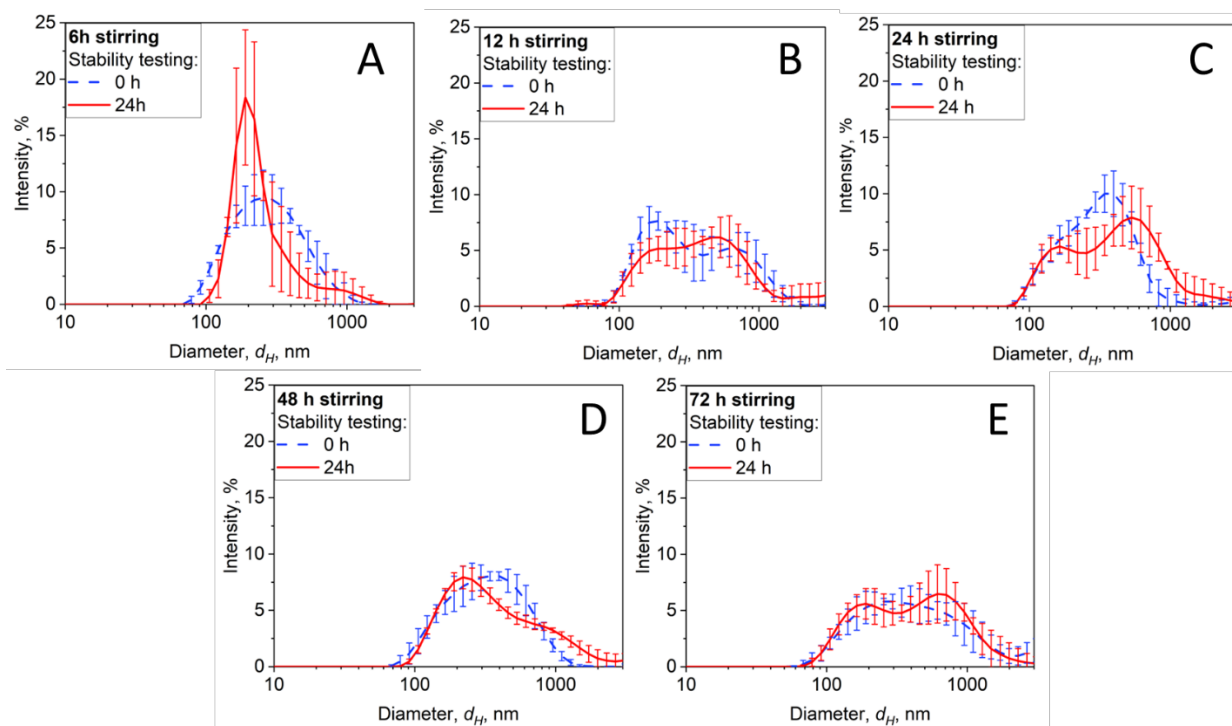

**Figure S4.** Stability of the BC size distribution measured in SABM medium right after stirring (broken lines) for 6 (A), 12 (B), 24 (C), 48 (D) and 72 h (E) or after 24 h of storage at room temperature (solid lines). The errorbars quantify the statistical variation over 3 measurements.

**Table S3.** Z-Average and polydispersity index (PDI) of BC NPs stirred in SABM medium from the data shown in Figure S4.

| BC in SABM stirred for: | Immediately after stirring |               | Stability testing (24 h) |               |
|-------------------------|----------------------------|---------------|--------------------------|---------------|
|                         | Z-Average (nm)             | PDI           | Z-Average (nm)           | PDI           |
| 6 h                     | 280 ± 19                   | 0.407 ± 0.016 | 321 ± 54                 | 0.469 ± 0.051 |
| 12 h                    | 319 ± 14                   | 0.410 ± 0.019 | 415 ± 6                  | 0.735 ± 0.037 |
| 24 h                    | 336 ± 26                   | 0.431 ± 0.022 | 326 ± 33                 | 0.456 ± 0.064 |
| 48 h                    | 309 ± 9                    | 0.409 ± 0.042 | 334 ± 12                 | 0.492 ± 0.044 |
| 72 h                    | 365 ± 7                    | 0.518 ± 0.087 | 379 ± 17                 | 0.476 ± 0.052 |

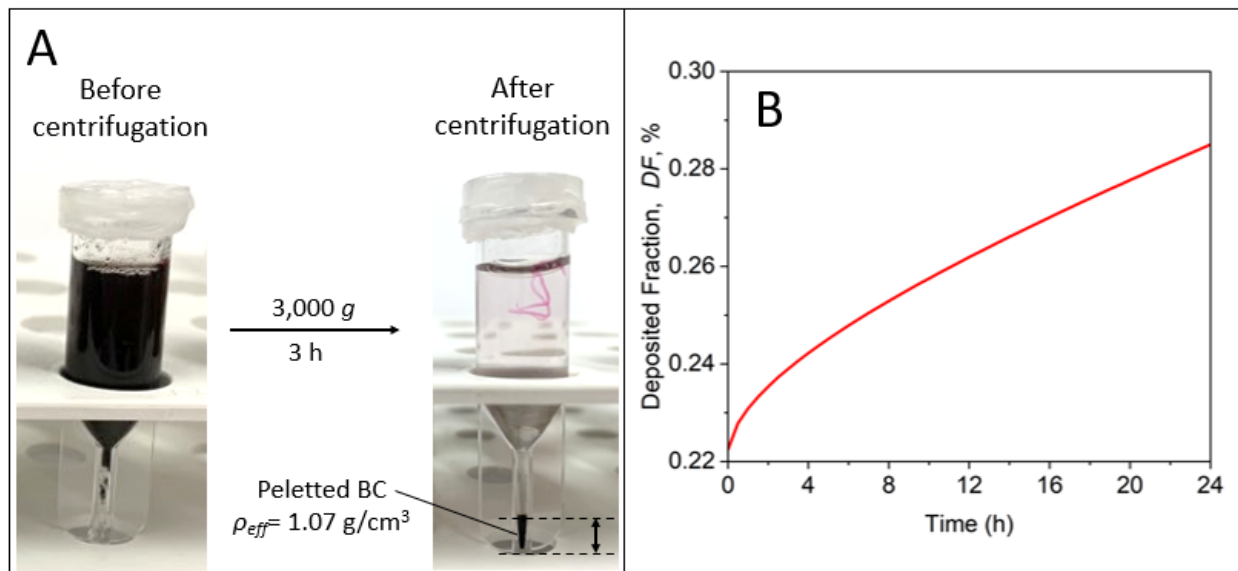

**Figure S5.** Effective density,  $\rho_{eff}$ , of BC NPs in SABM medium established by VCM method (A) and the deposited fraction calculated by the DG model (B).
